# Supplementary material
Source: PubMed Central journal article supplement (PMC4458414)
Supplement: NIHMS682829-supplement-1.pdf [file NIHMS682829-supplement-1.pdf]

# Supplementary Materials:

## Figure S1

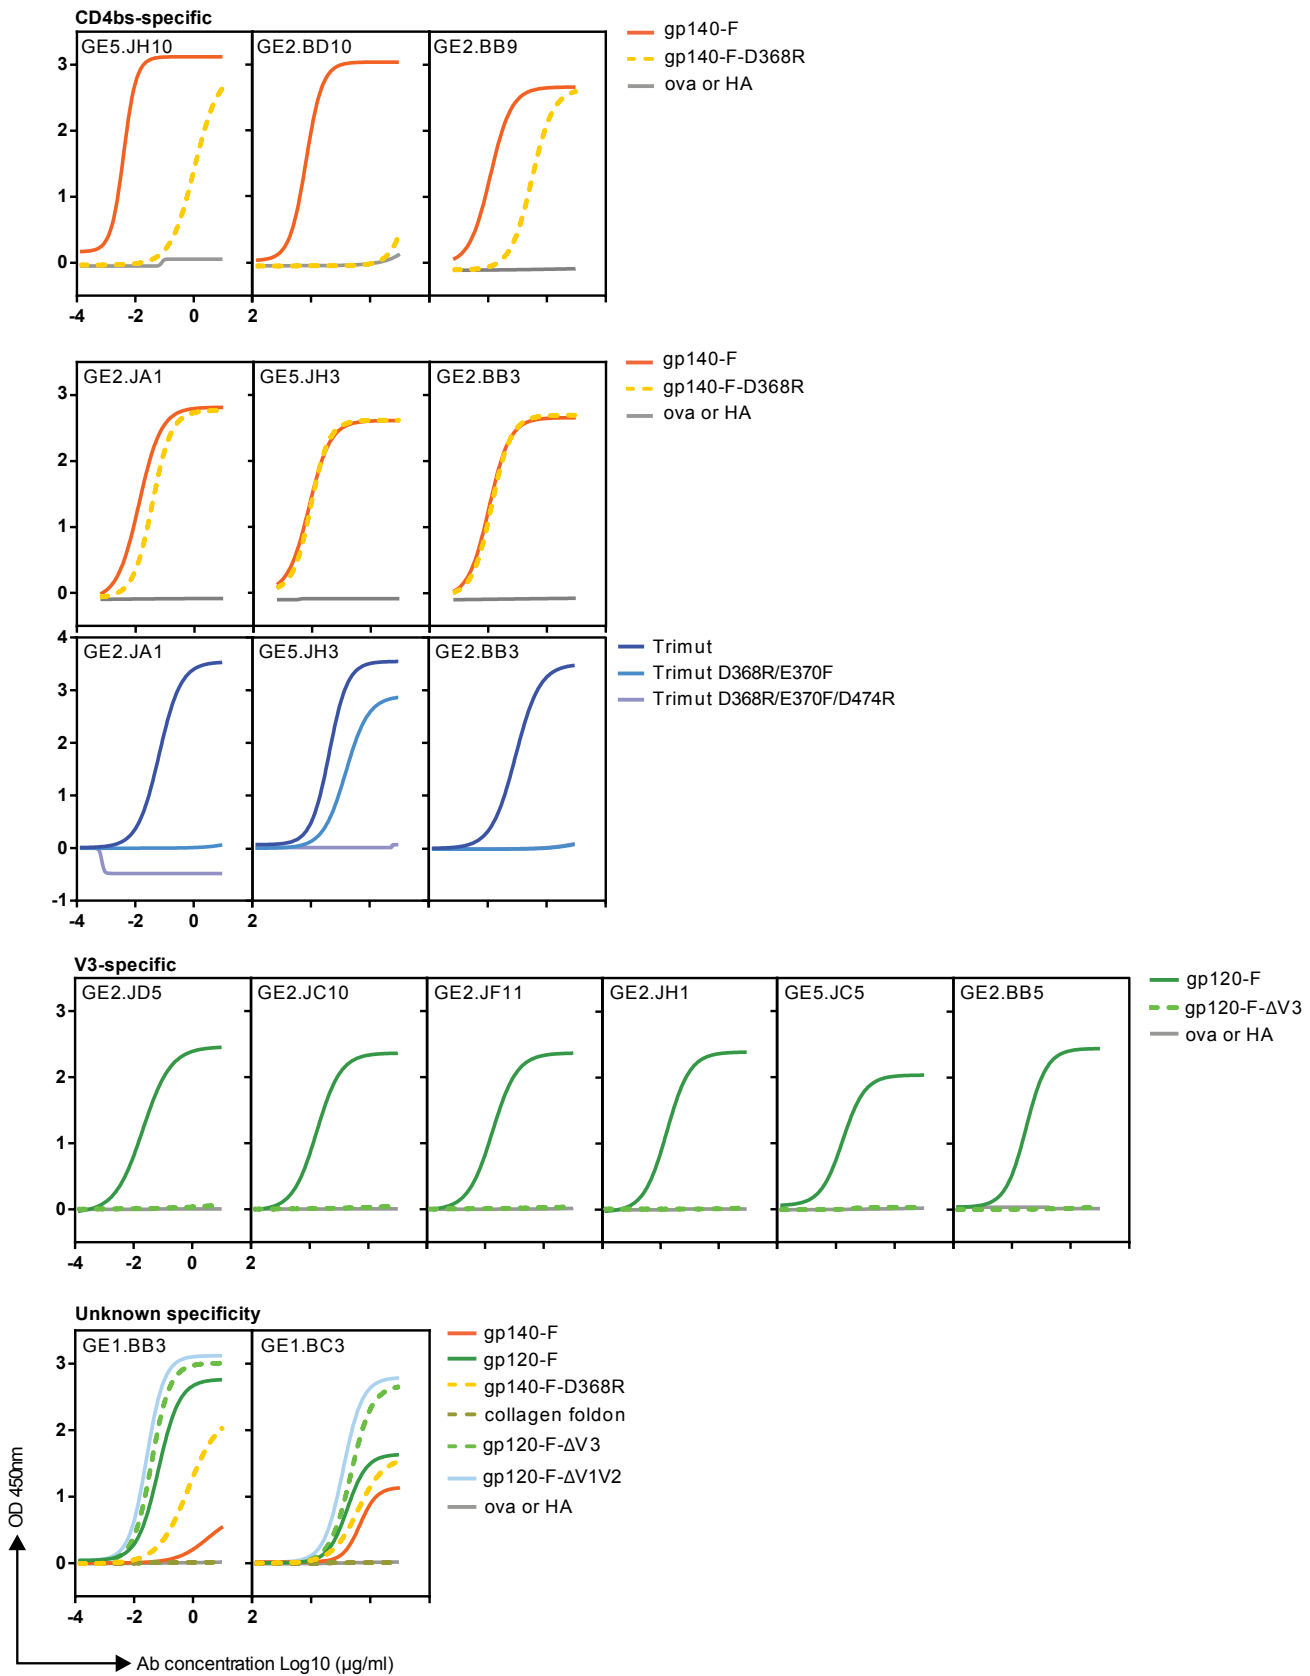

**Figure S1**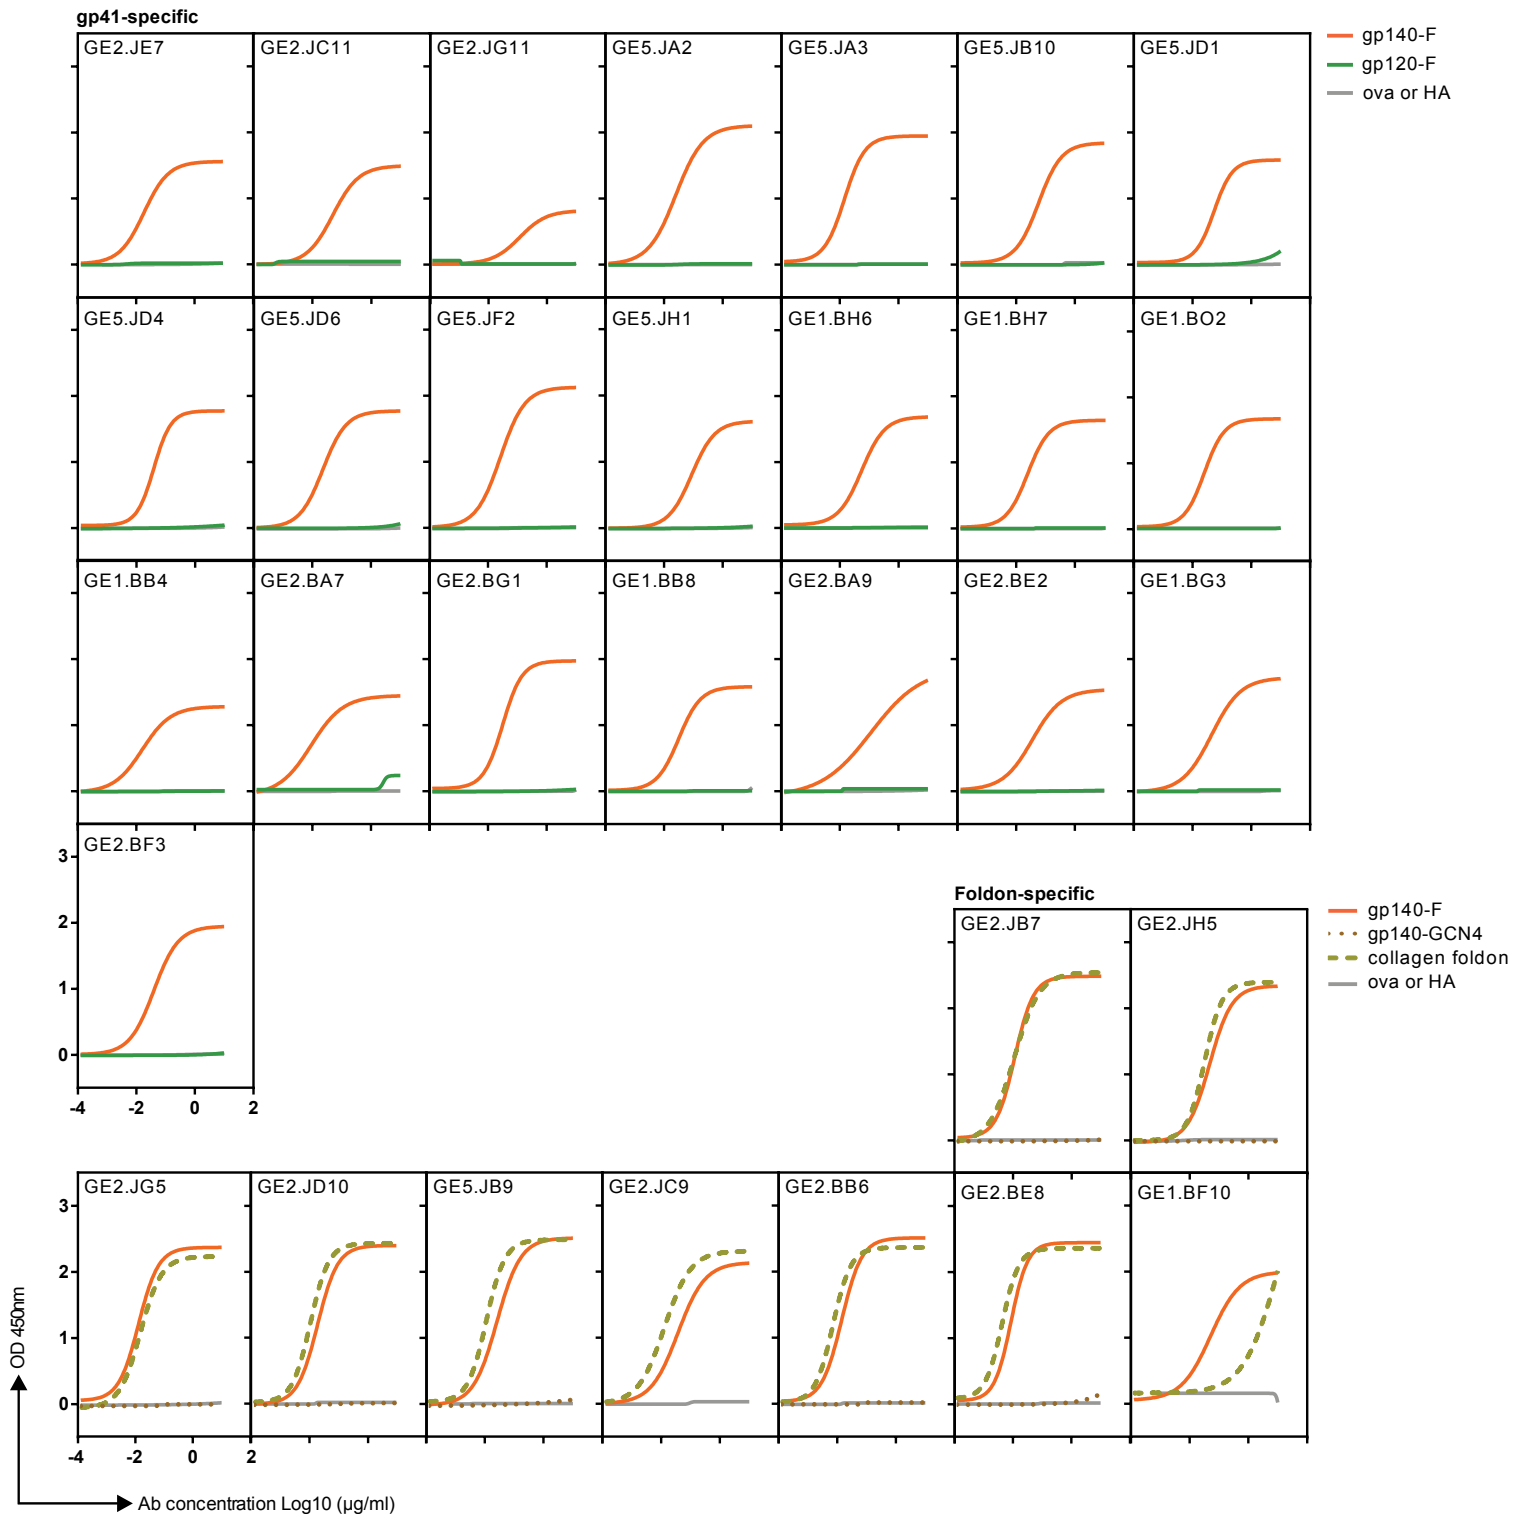

**Figure S1. Epitope mapping of Env-specific MAbs.** ELISA binding analyses of Env-specific MAbs were defined as follows: gp140-F and gp140-F-D368R (CD4bs-specific), gp120-F and gp120-F-ΔV3 (V3-specific), gp120-F and gp120-F-ΔV1V2 (V1V2-specific), gp140-F and gp120-F (gp41-specific), gp140-F, gp140-GCN4 and collagen foldon (foldon-specific). In addition to these probes, the CD4bs-directed MAbs that were insensitive to gp140-F-D368R were tested against TriMut, TriMut-D368R/E370F, and TriMut-D368R/E370F/D474R to confirm their CD4bs-epitope specificity. The MAbs that could not be mapped with this set of probes were designated as unknown specificity. Ova or influenza hemagglutinin-1 (HA1) were used as a controls. Titration curves are shown as Log10 dilutions (µg/ml). Representative binding curves are shown in Figure 1 and for the sub-specificities where more than one MAb was isolated the curves for the remaining MAbs are shown here.

**Figure S2**

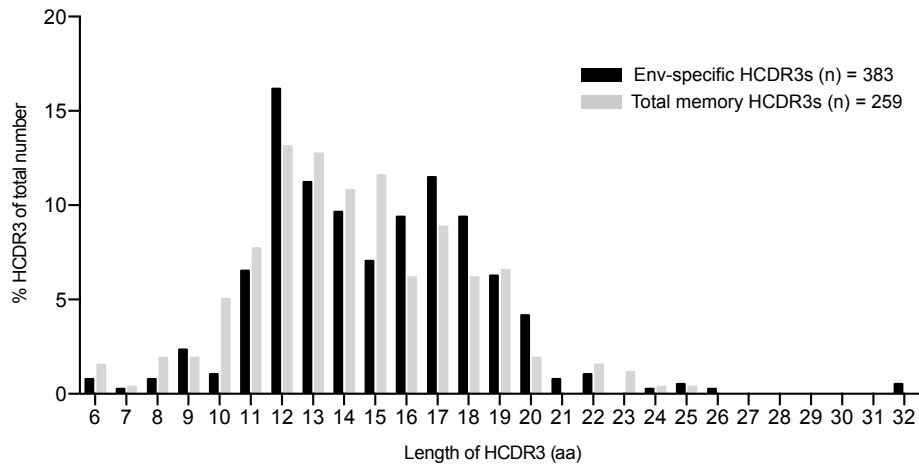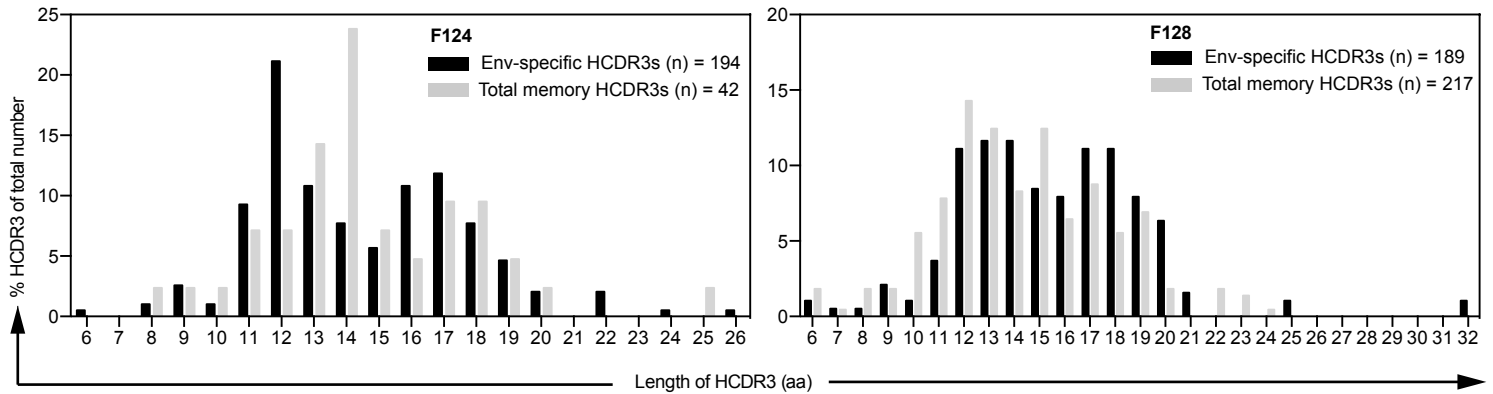

**Figure S2A. HCDR3 analyses of Env-specific and total memory IgG sequences.** The bars indicate the percentage HCDR3 sequences (Y-axis) of a given amino acid length (X-axis) of Env-specific (n=383) (black) and total memory (n=259) (gray) sequences from animals F124 and F128 (top panel) with the contribution from each donor shown separately (lower panels).

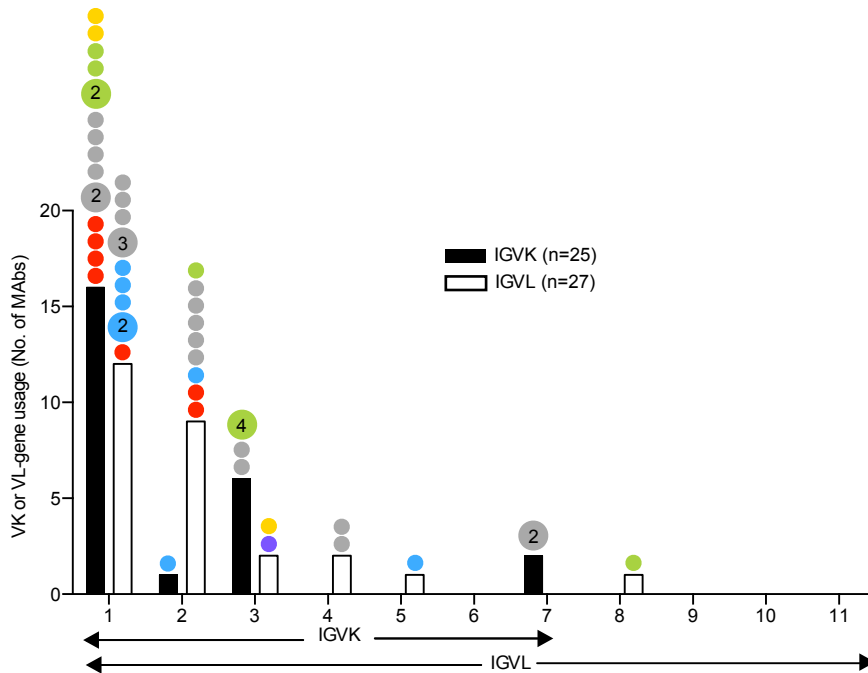

**Figure S2B. Analysis of light chains of Env-specific MAbs.** The number kappa and lambda light chain V gene usage by Env-specific MAbs indicated by black (VK) and white (VL) bars. The V gene families of kappa (1 to 7) and lambda (1 to 11) are shown on the X-axis. The colored dots above each bar indicate the epitope specificity of expressed MAbs using a given VK or VL family and larger dots indicate the number of clonally related MAbs identified.

**Figure S3**

|         |          | V3-region of HIV-1 |   |   |   |   |   |   |   |   |   |   |   |   |   |   |   |   |   |   |   |   |   |   |   |   |   |   |   |   |   |   |   |   |   |   |    |    |   |
|---------|----------|--------------------|---|---|---|---|---|---|---|---|---|---|---|---|---|---|---|---|---|---|---|---|---|---|---|---|---|---|---|---|---|---|---|---|---|---|----|----|---|
| Viruses | YU2      | 1                  | C | T | R | P | N | N | N | T | R | K | S | I | N | - | I | G | P | G | R | A | L | Y | T | G | E | I | I | G | D | I | R | Q | A | H | C  | 35 |   |
|         | HxBc2    | 1                  | C | T | R | P | N | N | N | T | R | K | R | I | R | I | Q | R | G | P | G | R | A | F | V | T | I | G | - | K | I | G | N | M | R | Q | A  | H  | C |
|         | YU2      | 1                  | C | T | R | P | N | N | N | T | R | K | S | I | N | I | G | P | G | R | A | L | Y | T | G | E | I | I | G | D | I | R | Q | A | H | C | 35 |    |   |
|         | JRFL     | 1                  | C | T | R | P | N | N | N | T | R | K | S | I | H | I | G | P | G | R | A | F | Y | T | T | G | E | I | I | G | D | I | R | Q | A | H | C  | 35 |   |
|         | 89.6     | 1                  | C | T | R | P | N | N | N | T | R | R | L | S | I | G | P | G | R | A | F | Y | A | R | R | N | I | I | G | D | I | R | Q | A | H | C | 35 |    |   |
|         | DJ263.8  | 1                  | C | P | R | P | N | N | N | T | R | K | S | V | R | I | G | P | G | Q | T | F | Y | A | T | G | D | I | I | G | D | I | R | Q | A | H | C  | 35 |   |
|         | MN       | 1                  | C | T | R | P | Y | N | N | R | R | T | R | I | H | I | G | P | G | R | A | F | Y | T | T | K | N | I | K | G | T | I | R | Q | A | H | C  | 35 |   |
|         | SF162    | 1                  | C | T | R | P | N | N | N | T | R | K | S | I | T | I | G | P | G | R | A | F | Y | A | T | G | D | I | I | G | D | I | R | Q | A | H | C  | 35 |   |
|         | ADA      | 1                  | C | T | R | P | N | N | N | T | R | K | S | I | H | I | G | P | G | R | A | F | Y | T | T | G | E | I | I | G | D | I | R | Q | A | H | C  | 35 |   |
|         | BaL.26   | 1                  | C | T | R | P | N | N | N | T | R | K | S | I | H | I | G | P | G | R | A | F | Y | T | T | G | E | I | I | G | D | I | R | Q | A | H | C  | 35 |   |
|         | SS1196.1 | 1                  | C | T | R | P | N | N | N | T | R | K | S | I | H | I | G | P | G | R | A | F | Y | A | T | G | G | V | I | G | D | I | R | Q | A | H | C  | 35 |   |
|         | JRCSF    | 1                  | C | T | R | P | S | N | N | T | R | K | S | I | H | I | G | P | G | R | A | F | Y | T | T | G | E | I | I | G | D | I | R | Q | A | H | C  | 35 |   |
|         | MW965.26 | 1                  | C | T | R | P | N | N | N | T | R | K | S | V | R | I | G | P | G | Q | T | F | Y | A | T | G | A | I | I | G | D | I | R | Q | A | H | C  | 35 |   |

**Figure S3. Sequence analysis of V3-regions of HIV-1.** Amino acid alignment of the V3-region of tier 1 and tier 2 HIV-1 isolates from clade A, B, and C are grouped as ‘V3-sensitive’ and ‘V3-insensitive’ based on their neutralization sensitivity against V3-directed MAbs. The V3 epitope targeted by the vaccine-induced V3-directed MAbs is highlighted in red. The V3 region sequences were obtained from the GenBank with the accession number as follows: M89973 (YU2), K03455 (HxBc2), U63632 (JRFL), U39362 (89.6), AF063223 (DJ263.8), AF443202 (MN), U08455 (SF162), AY426119 (ADA), DQ318211 (BaL.26), AY835442 (SS1196.1), M38429 (JRCSF), U08455 (MW965.26).
